1 **Title**

2 Informing epidemic (research) responses in a timely fashion by  
3 knowledge management - a Zika virus use case

4  
5 **Authors**

6 Angela Bauch<sup>1\*</sup>, Johann Pellet<sup>2</sup>, Tina Schleicher<sup>1</sup>, Xiao Yu<sup>3</sup>, Andrea Gelemanović<sup>4</sup>,  
7 Cosimo Cristella<sup>3</sup>, Pieter L. Fraaij<sup>5</sup>, Ozren Polasek<sup>4</sup>, Charles Auffray<sup>2</sup>, Dieter Maier<sup>1</sup>,  
8 Marion Koopmans<sup>5¶</sup>, Menno D. de Jong<sup>3¶</sup>

9  
10 **Affiliations**

11  
12 <sup>1</sup> Biomax Informatics AG, Planegg, Germany

13 <sup>2</sup> European Institute of Systems Biology and Medicine, Lyon, France

14 <sup>3</sup> Department of Medical Microbiology, Amsterdam UMC, University of  
15 Amsterdam, Amsterdam, the Netherlands

16 <sup>4</sup> Department of Public Health, University of Split School of Medicine,  
17 Split, Croatia

18 <sup>5</sup> Department of Viroscience and Department of Paediatrics, Erasmus  
19 Medical Centre, Rotterdam, the Netherlands

20  
21 \* Corresponding author

22 E-mail: [angela.bauch@biomax.com](mailto:angela.bauch@biomax.com)

23 ¶ These authors contributed equally

24

## 25 **Abstract**

26 The response of pathophysiological research to emerging epidemics often occurs  
27 after the epidemic and, as a consequence, has little to no impact on improving  
28 patient outcomes or on developing high-quality evidence to inform clinical  
29 management strategies during the epidemic. Rapid and informed guidance of  
30 epidemic (research) responses to severe infectious disease outbreaks requires quick  
31 compilation and integration of existing pathophysiological knowledge. As a case  
32 study we chose the Zika virus (ZIKV) outbreak that started in 2015 to develop a  
33 proof-of-concept knowledge repository. To extract data from available sources and  
34 build a computationally tractable and comprehensive molecular interaction map we  
35 applied generic knowledge management software for literature mining, expert  
36 knowledge curation, data integration, reporting and visualisation. A multi-disciplinary  
37 team of experts, including clinicians, virologists, bioinformaticians and knowledge  
38 management specialists, followed a pre-defined workflow for rapid integration and  
39 evaluation of available evidence. While conventional approaches usually require  
40 months to comb through the existing literature, the initial ZIKV KnowledgeBase  
41 (ZIKA KB) was completed within a few weeks. Recently we updated the ZIKA KB  
42 with additional curated data from the large amount of literature published since 2016  
43 and made it publicly available through a web interface together with a step-by-step  
44 guide to ensure reproducibility of the described use case (S4). In addition, a detailed  
45 online user manual is provided to enable the ZIKV research community to generate  
46 hypotheses, share knowledge, identify knowledge gaps, and interactively explore  
47 and interpret data (S5). A workflow for rapid response during outbreaks was  
48 generated, validated and refined and is also made available. The process described  
49 here can be used for timely structuring of pathophysiological knowledge for future

50 threats. The resulting structured biological knowledge is a helpful tool for  
51 computational data analysis and generation of predictive models and opens new  
52 avenues for infectious disease research.

53

54 **Availability:** [www.zikaknowledgebase.eu](http://www.zikaknowledgebase.eu)

55

## 56 **Funding**

57 European Commission's Seventh Framework Research Programme project

58 PREPARE (FP7-Health n°602525) and ZIKALLIANCE (MK, H2020; No 734548).

59

## 60 **Author summary**

61 During the recent ZIKV outbreak there was little information about the interactions  
62 between Zika virus and the host, however, the massive research response lead to a  
63 steep increase in the number of relevant publications within a very short period of  
64 time. At the time, there was no structured and comprehensive database available for  
65 integrated molecular and physiological data and knowledge about ZIKV infection.  
66 Researchers had to manually review the literature (amounting to over 5000 articles  
67 on ZIKV during our last update of the ZIKA KB in September 2018) to extract  
68 information about host–pathogen interaction and affected molecular, cellular and  
69 organ pathways. We explored the use of automated literature analysis and a defined  
70 cooperative effort between experts from various scientific, biomedical and  
71 information-technology domains to rapidly compile existing pathophysiological  
72 knowledge as a potential tool to support investigations during an emergency. This  
73 tool is contrasted with conventional approaches that would take months to comb

74 through the massive amount of existing literature. In addition to providing  
75 background information for research, scientific publications can be processed to  
76 transform textual information into complex networks, which can be integrated with  
77 existing knowledge resources to suggest novel hypotheses that potentially contribute  
78 to innovative infectious disease research approaches. This study shows that the  
79 knowledge extraction and mapping process required to inform clinical and research  
80 responses to an emerging epidemic can be efficiently and effectively executed with a  
81 dedicated and trained group of experts, a validated process and the necessary tools.  
82 Our results further provide an overview of ZIKV biology, allow prediction of drug  
83 efficacy and indentify specific host factors and signalling pathways affected by ZIKV.

84

85

## 86 **Introduction**

87 The response to a (re-)emerging infectious disease (ID) epidemic requires a rapid  
88 compilation of existing pathophysiological knowledge to inform research priorities  
89 guiding basic and clinical research. Gaps in understanding of the underlying  
90 mechanisms make it difficult to design effective disease-modifying therapies. Hence,  
91 during an emerging ID outbreak, the available information at the time of its  
92 emergence and the subsequent rapid accumulation of scientific knowledge from  
93 various sources needs to be captured and analysed in a timely and comprehensive  
94 fashion. Responding to an ID outbreak therefore would benefit from the use of a  
95 knowledge repository that organizes the disease-related knowledge into pathway,  
96 molecular interaction and disease maps. Such maps are a relatively new concept  
97 that have been used in neurodegenerative and heart diseases (1,2), but which have

98 had limited application in the field of ID thus far (3–5).

99 Molecular interaction and disease maps are dynamic computer-based knowledge  
100 repositories developed to integrate data and information across information sources,  
101 in a manner that is customized to the research domain of interest. Data types include  
102 interactions between molecular components, such as genes, pathogens, compounds  
103 and diseases.

104 The Platform foR European Preparedness Against (Re-)emerging Epidemics  
105 (PREPARE) is an EU-funded research consortium and clinical research network with  
106 the aim to rapidly respond to severe ID outbreaks, generating real-time evidence to  
107 inform optimized clinical management of patients and public health response. The  
108 2015 ZIKV outbreak was considered as a test case in the context of the PREPARE  
109 network, as the pathogenesis of neurologic or immune disease induced by ZIKV is  
110 not fully understood. ZIKV is a flavivirus belonging to the *Flaviviridae* family and had  
111 only marginally been researched prior to the 2015 epidemic was minimal (6–8).  
112 Outbreaks of ZIKV disease have been recorded in Africa, the Americas, Asia and the  
113 Pacific. Acute ZIKV infections are mostly asymptomatic or associated with mild and  
114 self-limiting symptoms of fever, rash, conjunctivitis, headache or joint pain (9,10).  
115 However, the unexpected association of ZIKV infection with pregnancy and the  
116 subsequent severe neurodevelopmental problems in offspring and with the  
117 occurrence of neurological illnesses such as Guillain-Barre syndrome (GBS) or  
118 meningoencephalitis in acutely infected patients, led to widespread global concerns  
119 and a Public Health Emergency of International Concern (PHEIC) declaration by  
120 World Health Organisation (WHO) in 2016 (7).

121 We used the ZIKV virus outbreak as a case study to develop and test the steps,  
122 tasks, protocols and tools necessary to rapidly gather and integrate existing and

123 emerging knowledge and to inform research priorities (Fig 1). Based on the  
124 available data and information we aimed to obtain a general overview of  
125 pathophysiological knowledge on ZIKV infection and its associated clinical  
126 manifestations described in the public domain. Other neurotropic flaviviruses, such  
127 as Dengue virus (DENV), West Nile virus (WNV), Japanese Encephalitis virus (JEV)  
128 and Tick-borne Encephalitis virus (TBEV) also cause nervous system infections, in  
129 particular encephalitis, but no association with neurodevelopmental disorders or  
130 GBS have been reported (11). To see whether including these viruses would shed  
131 additional light on ZIKV pathogenesis we compared available ZIKV information to  
132 other neurotropic flaviviruses in terms of neurovirulence and disease severity.

133

#### 134 **Fig 1. ZIKV KnowledgeBase generation process — Overview**

135 Based on the research objectives and knowledge provided by clinical/virology  
136 domain experts a six-step process was applied. In the first step a multidisciplinary  
137 expert team is assembled, in step 2, a semantic representation (“data model”) was  
138 designed by the knowledge management experts. This model includes details about  
139 the data sources for integration, how to transfer data into the system and how to  
140 report, visualize and export results, as well as the definition of the semantic context  
141 for objects, such as “gene”, “cell type” and “strain”. In a third step, a natural language  
142 processing algorithm was applied to the integrated PubMed literature source. In step  
143 4 the relevant data, including literature mining results, was imported into the system  
144 and semantically mapped to the data model. In step 5, queries, views and reports  
145 were formulated. In the last step a web-browser based user interface was  
146 implemented to enable clinical/virology experts to review, validate and refine the

147 integrated information.

148

## 149 **Methods**

### 150 **Rapid response protocol**

151 Many procedures have been published to collect knowledge from literature and  
152 experts, including systematic literature reviews (12), clinical guideline consensus  
153 building (13) and literature mining (14). Based on these approaches we developed a  
154 dedicated six step protocol with a focus on rapid assembly of existing knowledge  
155 (see Fig 1 and S1 Fig):

#### 156 **1. Team organisation and process management**

157 A multidisciplinary team of clinicians, virologists, bioinformaticians and knowledge  
158 management specialists was formed to collaboratively extract existing ZIKV related  
159 knowledge from the literature and from public databases, integrate the available  
160 information into a consistent summary and further connect integrated data to  
161 molecular and pharmaceutical information. To enable an efficient and consolidated  
162 initial result, tasks were distributed between individuals and results were discussed  
163 and integrated in weekly online conferences. The detailed protocol for knowledge  
164 base generation was developed in this initial exercise and is presented in the results  
165 section.

#### 166 **2. Knowledge Management**

167 For data organization, integration and development of molecular interaction and  
168 disease maps, a dedicated knowledge management tool is required. In this case,  
169 one of the PREPARE partners contributed the BioXM™ Knowledge Management

170 Environment, a generic platform for dynamic modelling, visualization and analysis of  
171 biological and biomedical networks (15). For knowledge representation we applied a  
172 semantic network approach as described previously (16,17). Briefly, the abstract  
173 concepts necessary to capture and represent essential ideas and physical objects  
174 relevant to the domain of knowledge were defined. Based on input from clinical and  
175 virology experts, the concepts required to represent existing pathophysiological  
176 knowledge of infectious diseases were modelled with objects, such as “genes”,  
177 “strains”, “is expressed in” or “interacts with”. For the ZIKV KB, we focused on  
178 concepts required to represent text-mining results and information from structured  
179 databases of protein–protein (PPI) and drug–protein interactions, namely genes,  
180 diseases, pathogens and drugs. Relationships between pathogens, genes, drugs  
181 and compounds extracted by text-mining were represented by three types of  
182 relations: up-regulation, down-regulation and regulation (for further details see S2  
183 Fig). Where possible, each concept was referenced to unique entries from reference  
184 databases or ontologies such as ChEBI (18) for chemicals and ICD10 (19) for  
185 diseases. The defined semantic concepts become directly available in a natural-  
186 language-like query and reporting language. This language can be used to address  
187 specific questions and to summarise and visualise available knowledge. For  
188 example, the query “is a *drug* which *interacts with* is a *protein* from *organism human*  
189 which *is expressed by* a *gene* which is *associated with* a *organism Zika*” retrieves the  
190 number of drugs that interact with a protein of interest and generates a visualisation  
191 which applies a color coding to genes that indicates to the number of associated  
192 drugs.

### 193 **3. Text mining**

194 The integrated text mining tool uses syntactic text parsing and dictionary-based



195 named-entity recognition to extract semantically typed associations (such as  
196 “inhibits”, “activates”) between the defined semantic concepts (such as “gene”,  
197 “strain”) (20). The initial task creates a defined text corpus, which includes uploaded  
198 relevant full text articles if applicable. In principle the textual materials for mining can  
199 be derived from PubMed abstracts, text from the WHO or other news feeds or any  
200 document in the portable document format (PDF), Microsoft Word or American  
201 Standard Code for Information Interchange (ASCII) formats. For the case study  
202 described here we used all ZIKV PubMed abstracts and publicly openly available full  
203 text articles. From these sources, relationships between genes, diseases, pathogens  
204 and drugs were extracted. The extracted associations consist of a subject, an object  
205 and the linking predicate and are enriched by their supportive evidence and  
206 additional metadata. For example, one such relationship is “Zika virus (subject)  
207 causes (predicate) microcephaly (object)” (Fig 2). Genes, diseases, pathogens and  
208 drugs, can be used as subjects and as objects and the sum of all extracted  
209 associations form an initial knowledge network. Genes, diseases, pathogens and  
210 drugs were defined by dictionaries that we curated from public sources as described  
211 below. Each dictionary consists of a well-defined set of ontologies (including  
212 synonyms) or reference databases tailored to the research question of interest. For  
213 instance, the disease dictionary consists of Disease ontology entries (21) and  
214 relevant branches of the NCI Thesaurus (22), the organism dictionary of NCBI  
215 taxonomy entries (23), the compound dictionary of ChEBI entries (18), as well as of  
216 KEGG (24) and NCI Thesaurus compounds. The gene dictionary is based on genes  
217 derived from human and flavivirus genomes. Predicates are derived from a set of  
218 verbs, which can be modified. These predicates describe mainly molecular  
219 interactions but can also indicate causal associations between proteins or

220 compounds and diseases (for instance “activates”, “restricts”, “targets”). To optimise  
221 recall and specificity of the mining, we extended the dictionaries for viral names,  
222 acronyms and interaction predicates as well as defined a black-list of acronyms  
223 causing mostly false positives.

224

## 225 **Fig 2. Predicated text mining relationship**

226 A text mining relationship consists of a subject (ZIKV), an object (microcephaly) and  
227 a linking predicate (causes). Subject and object are defined by dictionaries  
228 consisting of ontologies or reference databases, whereas predicates are derived  
229 from a fixed set of verbs with assertions from integrated sources, such as Medline.  
230 The term "microcephaly" is a reusable scientific concept that participates not just in  
231 one "Subject-Predicate-Object" construct detected, but in all such constructs  
232 detected that mention " microcephaly". Supplementary information is associated with  
233 the "microcephaly" object, including, for example, information from the Disease  
234 ontology, and other integrated resources, such as Gene-Disease-Association data  
235 (DisGeNET). This expandable set of relationships forms a large network of  
236 knowledge that enables new knowledge to be inferred by "reasoning" based on the  
237 logic encoded in those relationships.

238

239 Finally, the extracted relationships can be curated to manually optimise quality and  
240 information content. A curation user interface was implemented to enable the expert  
241 team to support or refute the automatically generated relationships. At least two  
242 independent researchers (the “4-eye review mode”) manually evaluated the  
243 evidence for every extracted relationship. In the case that the evaluations from the

244 two researchers conflicted, the conflicts were either resolved during the weekly  
245 online conferences or were excluded, as our goal was to maximise specificity  
246 (correctness) rather than sensitivity (completeness) of the integrated information.

247 In addition, experts could expand the network with any relevant supporting evidence  
248 from other integrated sources, such as public or proprietary databases and  
249 experimental data.

#### 250 **4. Semantic mapping of experimental results, public data sources and** 251 **ontologies**

252 Semantic mapping describes the process of identifying and linking concepts that are  
253 shared between two information sources. We integrated the databases listed in  
254 Table 1 using existing concepts such as genes, pathogens or diseases which were  
255 identified by ontological descriptors. Semantically identical objects are mapped to  
256 descriptive data from literature and databases to allow informed and efficient  
257 querying of the overall collected information (e.g. “Dengue disease” is mapped to the  
258 following synonyms: “Breakbone fever”, “Dengue disorder”, “Dengue fever” and  
259 “Dengue”) (25). To this end, mapping scripts are created to resolve a given input  
260 data format and match the provided entity identifiers or ontology terms. Experimental  
261 data from key publications is mapped by the same approach. While these data are  
262 henceforth available for search and reporting they are not yet displayed as part of  
263 any specific molecular interaction and disease map.

| Source<br>database | Information type | Current<br>statistics | Level of curation | Update<br>frequency and<br>version |
|--------------------|------------------|-----------------------|-------------------|------------------------------------|
|--------------------|------------------|-----------------------|-------------------|------------------------------------|

|                  |                                              |             |                                                                                              |                                        |
|------------------|----------------------------------------------|-------------|----------------------------------------------------------------------------------------------|----------------------------------------|
| ATC              | Anatomical Therapeutic Classification System | 6064        |                                                                                              | 2016                                   |
| BioGRID          | Protein-protein interaction                  | 293022      | Manually curated from literature<br>Different evidence codes                                 | Updated monthly<br>vVersion 3.4.137    |
| BioGRID          | Protein-drug interaction                     | 10722       | Manually curated from literature<br>Different evidence codes                                 | Updated monthly<br>Version 3.4.137     |
| ChEBI            | Compound information                         | 161090      | Curated from different data sources                                                          | Updated weekly                         |
| DisGeNET         | Gene-disease associations                    | 429036      | Integrated from several public data sources and literature<br>Score for ranking associations | Permanently updated<br>Version 4.0.0.0 |
| Disease ontology | Standardized ontology for human disease      | 15043       | Manually curated                                                                             | Updated weekly                         |
| DrugBank         | Drug and Drug Target database                | 8203        | Manually curated from literature                                                             | Updated weekly                         |
| EntrezGene       | Gene functional information                  | >24 million | Curated information integrated from different databases, based on RefSeq genomes             | Updated weekly                         |

|                          |                                                                      |             |                                           |                              |
|--------------------------|----------------------------------------------------------------------|-------------|-------------------------------------------|------------------------------|
| Human Phenotype Ontology | standardized vocabulary of phenotypic abnormalities in human disease | 11592       |                                           | 2016                         |
| KEGG                     | Pathways and reactions                                               | 273         | Manually curated from literature          | 2008                         |
| NCI Thesaurus            | Controlled vocabulary of the National Cancer institute               | 118502      | Manually curated from literature          | Updated weekly               |
| OMIM                     | Gene - disease relations                                             | 21395       | Curated form literature                   | Updated weekly               |
| PubMed                   | Literature                                                           | >24 million | Automatic collection with manual curation | Updated weekly               |
| Reactome                 | Pathways and reactions                                               | 5334        | Manually curated from literature          | Updated quartely<br>Aug 2016 |
| UniProtKB                | Protein sequences                                                    | >65 million | Manually curated                          | updated bi-weekly            |
| VirHostNet               | Virus/Host molecular interactions                                    | 44310       | Manually curated from literature          | 2.0 (March 2016)             |

264 **Table 1. External data sources integrated into ZIKV KnowledgeBase**

265

266 **5. Querying and visualization of integrated information in tables, networks and**  
 267 **disease maps**

268 To help the expert team establish a specific molecular interaction and disease map

269 we defined a number of queries to explore the collective knowledge. These queries  
270 were used, for example, to find diseases and genes associated with a virus of  
271 interest to find diseases associated with genes prioritized according to experimental  
272 evidence.

273 Based on these queries we developed a streamlined, wizard-based user interface to  
274 create disease maps by selecting the relevant relationships from the curated text  
275 mining from query results (S3 Fig). This basic network was further extended with  
276 interaction data (e.g. PPI & protein-drug interaction) by applying a network search  
277 algorithm based on genes extracted from text mining relationships. Finally, we  
278 defined queries to overlay additional information, such as literature evidence,  
279 experimental data, drug targets or host factors to obtain different perspectives of the  
280 same underlying molecular interaction or disease map.

## 281 **6. Deployment of an open access, web-based user interface**

282 To make the results of our internal test case generally available and to support ZIKV  
283 research, we provide and maintain a regularly updated ZIKA KB at the following URL  
284 [www.zikaknowledgebase.eu](http://www.zikaknowledgebase.eu). As we continue to extend this resource user  
285 registration for access will be implemented to ensure the knowledge base is used for  
286 research only.

287

## 288 **Results**

289

### 290 **Semantic representation of ZIKV infection**

291 The data model implemented to provide a semantic representation of ZIKV infection

292 is described in detail in supplemental Figure S2. Briefly, the model focuses on  
293 genes, diseases, pathogens and drugs, and distinguishes between associations  
294 derived from literature mining and those provided by experimental data such as  
295 PPIs.

## 296 **Text mining results**

297 We searched PubMed with the terms “Zika virus”, “Dengue”, “West Nile virus”,  
298 “Japanese encephalitis virus”, “Tick-borne encephalitis virus”, “Microcephaly” and  
299 “Guillain Barre Syndrome” initially in December 2016 and most recently in  
300 September 2018. The recent search resulted in 4927 hits for “Zika virus” and 19974,  
301 7700, 5918, 5213, 14248 and 8615 hits for the other search terms, respectively.  
302 During the analysed time frame, literature on ZIKV increased substantially from 1414  
303 in 2016 to the current 4927 hits (250%), whereas for all other terms, the increase in  
304 publications was closer to 10%. Accordingly, the recent search identified additional  
305 disease phenotypes, including carditis and skin diseases, that were reported to be  
306 associated with ZIKV that were not present in the previous search. An additional set  
307 of 236 open access full text articles about ZIKV were included. A natural language  
308 processing algorithm was applied to these sets of documents to efficiently extract the  
309 fast growing information in the biomedical literature. The text mining extracted a total  
310 of 11916 relationships, which were manually evaluated to 2982 verified relationships  
311 (Table 2). The distribution of the curated relationships is depicted in Fig 3, indicating  
312 that the largest overlap was for ZIKV and DENV and for DENV and WNV. The  
313 curated set of relationships was used for further analyses, including generation of  
314 molecular interaction and disease maps and querying for virus-associated genes or  
315 diseases.

| Text corpus | Key word                      | Number of documents        | Number of relationships | Curated relationships |
|-------------|-------------------------------|----------------------------|-------------------------|-----------------------|
| ZIKV virus  |                               |                            |                         |                       |
| FT          | Zika virus                    | 4,927; 236 FT <sup>a</sup> | 1,192                   | 298                   |
| Medline     | Dengue                        | 19,974                     | 5,868                   | 1,277                 |
| Medline     | West Nile virus               | 7,700                      | 1,586                   | 387                   |
| Medline     | Japanese encephalitis virus   | 5,918                      | 1,594                   | 354                   |
| Medline     | Tick-borne encephalitis virus | 5,213                      | 508                     | 134                   |
| Medline     | Microcephaly                  | 6,896                      | 749                     | 314                   |
| Medline     | Guillain Barre Syndrome       | 4,133                      | 419                     | 218                   |
| Total       |                               |                            | 11,916                  | 2,982                 |

316 **Table 2. Text mining analyses.** <sup>a</sup>FT: full text

317

318 **Fig 3. Distribution of text mining relationships.** Numbers represent the sum of  
 319 different types of relationships, such as gene-pathogen, gene-disease, gene-gene,  
 320 gene-compound and pathogen-disease relations, found for each virus in total as well  
 321 as in overlap with other viruses (A), or ZIKV in overlap with text mining analyses of  
 322 Microcephaly and Guillain-Barre Syndrome (B).

323

### 324 **Integrated data**

325 Overall, the ZIKA KB contains a network of 337332 human and host-pathogen PPI  
 326 integrated from BioGRID and VirHostNet, as well as 18905 protein-drug interactions



327 integrated from BioGRID and DrugBank, and 450431 gene-disease associations  
328 from DisGeNET (Table 1). Recently, a variety of ZIKV- and other flavivirus-related  
329 large-scale data sets, including microarray gene expression (26,27), RNAseq (28) as  
330 well as CRISPR/Cas data (29), have become publicly available and were integrated  
331 to identify host factors that are affected during viral infection.

### 332 **Molecular interaction and disease maps**

333 Curated text mining results were used to populate the initial ZIKV molecular  
334 interaction and disease map. In a second step the map was extended with  
335 interaction data (PPI & protein-drug interaction by applying, a network search to  
336 implement the breadth-first algorithm (30) which connected genes extracted from text  
337 mining relationships based on the overall network. This set of interaction data can be  
338 filtered and explored interactively. In a systems medicine approach, a  
339 multidisciplinary expert team systematically analysed literature, public databases and  
340 experimental resources to create a formal, structured model of molecular and cellular  
341 ZIKV–host interactions (“molecular interaction and disease map”)

### 342 **Publicly available ZIKA KB**

343 After an assessment period of internal use, a web-browser based user interface was  
344 implemented to make the PREPARE ZIKA KB available to all ZIKV researchers. By  
345 openly sharing the collected data and information, the ZIKA KB allows researchers to  
346 generate hypotheses, identify knowledge gaps and interactively explore and interpret  
347 data. All data are currently in the public domain. Upon request, data submission can  
348 be modified to allow registered users to specify that submitted data should not be  
349 publicly available

350 .

### 351 **Use of the ZIKA KB**

352 In the following we provide several example use cases. For instance, publicly  
353 available interaction data, such as the PPI and protein–drug interaction data can be  
354 used to visualize drug targets and host factors involved in ZIKV pathogenesis.  
355 Alternatively, users can filter for PPIs whose source or target is a drug or refine  
356 search results to include only proteins localized to a specific cellular compartment,  
357 such as the endoplasmic reticulum. The returned networks can be interrogated  
358 subsequently to identify host factors that are targeted by the virus and to search for  
359 drugs that interact with these host factors. and thus might contribute to drug  
360 repositioning for future treatment options for ZIKV infection. The maps can also be  
361 explored further by using integrated expression and knockout data.

362 To explore the integrated literature knowledge for relevance or obtain an overview of  
363 drug targets or identify critical genes within the network consisting of gene-disease-  
364 pathogen relationships, predefined perspectives were overlaid onto the default map.  
365 The association of ZIKV with microcephaly was reported most frequently across all  
366 ZIKV literature and this association is visualized by the thickness of the edges (Fig  
367 4A). Known drug targets interacting directly with ZIKV or microcephaly were  
368 highlighted in green for potential intervention evaluation (Fig 4B). Genes playing a  
369 role in ZIKV infected human neural progenitor cells (hNPCs) were also highlighted  
370 for comparative analyses of complementary experimental analyses (Fig 4C).

371

372 **Fig 4. Different ZIKV molecular interaction and disease map perspectives.** (A)  
373 The amount of literature evidence is depicted by relation strength. (B) Genes known  
374 to be drug targets are color coded: the gene is a target for one (green) or five or  
375 more (blue) drugs or no drugs (orange). (C) Genes (hNPCs challenged with ZIKV,  
376 Tang et al, 2016) are color coded to indicate up- (red) and down- (blue) regulation .  
377

#### 378 *Diseases associated with flaviviruses*

379 To further explore and validate the knowledge derived from the curated text mining  
380 analyses, diseases associated with a virus of interest were queried. The results are  
381 displayed in Fig 5. It was assumed that the disorders that were most frequently  
382 associated with a virus were the primary disorder for infection with the virus.  
383 Microcephaly and GBS, for instance, are the most frequently mentioned disorders  
384 associated with ZIKV infection. Dengue fever and hematopoietic system disorders  
385 (e.g. thrombocytopenia) are frequently listed for DENV, whereas encephalitis is the  
386 most frequently mentioned disease for WNV, JEV and TBEV. Each disease thus  
387 represents the corresponding primary manifestation of these viral infections.  
388 Encephalitis is equally frequently associated with ZIKV and DENV confirming that  
389 ZIKV is also an aetiological agent in encephalitis.

390

391 **Fig 5. Diseases associated with flaviviruses.** The amount of literature evidence  
392 (y-axis) for each of the diseases (x-axis) is grouped for the five flaviviruses. Symbols  
393 highlight neurological diseases associated with more than one virus. Triangle: GBS,  
394 moon: Encephalitis, pie-chart: Peripheral nervous system disease, star: Neurologic  
395 manifestations

396

397

398 *Potential inhibitors of ZIKV infection*

399

400 Currently there is no approved therapy to treat ZIKV infection. Barrows *et al* recently  
401 performed a screen of 774 FDA-approved drugs to identify agents that could  
402 potentially be repositioned as treatment options for ZIKV infection (31). Of these, 24  
403 potential inhibitors of ZIKV infection were identified and validated in human neural  
404 stem cells and primary amnion cells. In addition to their potential use for treatment,  
405 these compounds provide a resource to study ZIKV pathogenesis and can contribute  
406 to insights into the biology of ZIKV. To this end, the ZIKV molecular interaction and  
407 disease map described in Figure 4 was extended and filtered to include these  
408 potential “*ZIKV effective drugs*” which were connected to genes associated to ZIKV  
409 through PPIs (Fig 6). After this extension ten of the identified *ZIKV effective drugs*  
410 were part of the new map which we then used to gain insight into potential drug  
411 mechanisms and ZIKV biology. One of the drugs, Bortezomib, is a known antiviral  
412 compound that inhibits replication of flaviviruses (32). Bortezomib is a proteasome  
413 inhibitor, suggesting that proteasome action is essential for ZIKV replication. This  
414 conclusion is in agreement with published CRISPR screen data (29) identifying  
415 genes associated with protein degradation required for ZIKV infectivity. Interestingly,  
416 four of the predicted *ZIKV effective drugs* (Mefloquine, Mebendazole, Sorafenib and  
417 Dactinomycin) are associated with genes which, through PPIs, are involved in ErbB  
418 signalling. *ErbB* is associated with the development of neurodegenerative diseases  
419 when inactivated (33). Four of these genes (*MYC*, *GSK3B*, *BRAF* and *MAP2K2*) are  
420 reported to be up-regulated in a published RNAseq analysis (28) performed in

421 human embryonic cortical neural progenitor cells (Fig 7). These genes can serve as  
422 an entry point to be tested in specific assays designed to unravel molecular  
423 mechanisms between of ZIKV involvement in microcephaly.

424 Another predicted *ZIKV effective drug* is Sorafenib, a multi-target tyrosine kinase  
425 inhibitor. The ZIKV map was used to identify the effective target of Sorafenib:

426 1. Sorafenib interacts with 4 target genes, *FLT3*, *BRAF*, *VEGFR* (also known as  
427 *KDR*) and *PDGFR*. The latter two genes are known to interact with additional drugs,  
428 such as Sunitinib, Pazopanib, Dasatinib and Imatinib. These additional drugs were  
429 among those which had no effect in the ZIKV infection assay.

430 2. In ZIKV infection expression data, none of the genes producing protein products  
431 that interact with VEGFR and PDGFR through known PPI (orange edges) with ZIKV  
432 are differentially expressed (Fig 8). In contrast, *BRAF* and *SOCS2*, a *FLT3*  
433 interactor, were unregulated upon ZIKV infection.

434 Based on the observations above drawn from the ZIKV map, we hypothesise that  
435 *FLT3* or *BRAF* are the effective targets of Sorafenib in ZIKV infection, rather than  
436 *VEGFR* and *PDGFR*. This exemplifies how molecular interaction and disease maps  
437 can be used to provide further insight into ZIKV biology.

438

439 **Fig 6. ZIKV molecular interaction and disease map extended for ZIKV effective**  
440 **drugs.**

441 The following are the symbols used in the map. Orange circles: genes; green stars:  
442 ZIKV effective drugs; yellow rectangles: flaviviruses; pink rectangles: diseases; violet  
443 rectangles: GO processes or KEGG signalling pathways. The following edge colors  
444 are used in the map. Black edges: relationships derived from text mining; orange:  
445 protein-drug or PPIs. The latter were obtained by applying a network search

446 algorithm selecting the drug target of a ZIKV effective drug as start and STAT2  
447 (contained in a direct relation with ZIKV) as the end point.

448

449 **Fig 7. ZIKV molecular interaction and disease map extended for ZIKV effective**  
450 **drugs (enlarged perspective).**

451 Up- and down-regulated genes (hNPCs challenged with ZIKV, Tang et al, 2016) are  
452 highlighted by a color code ranging from red to blue from enlarged perspectives  
453 surrounded by dotted boxes in Figure 6.

454

455 **Fig 8. ZIKV molecular interaction and disease map extended for ZIKV effective**  
456 **drugs (enlarged perspective).**

457 Up- and down-regulated genes (hNPCs challenged with ZIKV, Tang et al, 2016) are  
458 highlighted by a color code ranging from red to blue from enlarged perspectives  
459 surrounded by dotted boxes in Figure 7.

460

461

462 The network analysis described above could also be used to rank drugs according to  
463 their distance to known ZIKV associated genes, such as STAT2, to suggest a metric  
464 for prioritisation in screening assays (34). The discussed extended ZIKV map contains  
465 429 target gene products that interact with FDA approved drugs. Evaluation of the  
466 distance between STAT2 and drug targets via experimentally proven PPIs revealed  
467 that targets of ZIKV effective drugs were on average more proximal to STAT2  
468 compared to other targets.

469 Combining the proximity measure with additional knowledge, for example the “FDA  
470 pregnancy” label, reduces the number of drugs to be screened from 774 to 64.

471

472

473 **Discussion**

474

475 In case of an emerging epidemic, public health as well as clinical and preclinical  
476 research responses are typically hampered by a lack of structured, curated and  
477 actionable knowledge. The results of this study describe an approach to knowledge  
478 extraction and mapping that can quickly provide an overview of existing and missing  
479 information if done by a dedicated and trained group of experts. The developed  
480 workflow does not follow formal expert consensus seeking processes, such as  
481 Delphi (13), systematic literature review processes such as Cochrane (35) and  
482 PRISMA (12), or medical guideline related processes (36,) as these processes are  
483 not compatible with the need for speed during emerging epidemics. Nevertheless,  
484 the workflow adopts several important aspects of good practice: it is systematic,  
485 independent and transparent, provides evidence for all integrated information and  
486 uses appropriate quality criteria. Combined with the software tools employed in the  
487 process, this pragmatic approach enabled much faster knowledge generation than  
488 more traditional methods.

489

490 The tools employed in the process need to be able to semantically integrate  
491 disparate structured resources of heterogeneous data with ease. However, much of  
492 the knowledge that represents scientific research advancements is locked within the  
493 unstructured text of classical publications, such as journal articles, newsfeeds or  
494 free-form web publications (e.g. Zika-related clinical information at  
495 <http://www.ovid.com/site/zika/resources.html>). The sheer volume of this published

496 information grows constantly and exponentially and, for the most active areas of  
497 research, far exceeds the capacity of individual scientists and medical doctors to  
498 identify and read all relevant articles. Literature mining, a well-established technology  
499 to extract meaningful information from text, provides valuable assistance in  
500 structuring the massive amounts of text data and, therefore, is an indispensable tool  
501 in the process of guidance generation. Dynamic integration of objects and the  
502 relationships they participate in that are present in the literature through the use of  
503 structured resources and experimental data is a pre-requisite for analysis and  
504 distinguishes the ZIKA KB from text mining-only solutions, such as ContentMine  
505 (<http://contentmine.org/>) or databases dedicated to specific questions such as  
506 SncRNAs linking to disease symptoms (<http://zikadb.cpqrr.fiocruz.br/zika/>).

507

508 Beyond our initial analysis presented here, users can explore the ZIKA KB within a  
509 web-based user interface with the use of the online manual (S5) and the step-by-  
510 step guide (S4) to reproduce the presented results. We will collect and highly  
511 appreciate any user feedback to optimise user experience for broad adoption. In  
512 contrast to alternative useful resources such as the Virus Pathogen Resource  
513 ([vprbrc.org](http://vprbrc.org)), which focus on gene and protein sequences, the ZIKA KB integrates  
514 genetic, phenotypic and drug knowledge about ZIKV to facilitate the generation of  
515 hypotheses, define research priorities and enable better understanding of viral  
516 pathogenesis. In addition to interactive exploration, a corresponding ranking of  
517 connections in a network based on integration of multiple pieces of biological  
518 evidence can also be performed systematically and on a large scale, for example, by  
519 applying the ChainRank method (37), which we plan to integrate in the future.

520



521 Based on the text mining analyses performed here, disease profiles for the set of five  
522 neurotropic flaviviruses were confirmed. Common knowledge was retrieved along  
523 with underlying literature evidence and rare manifestations, such as encephalitis,  
524 associating with ZIKV and DENV.

525

526 Using a molecular interaction and disease map based on ZIKV, Microcephaly, and  
527 GBS text mining analyses results, we showed that further exploration of the  
528 described map can provide insight into, for example, ZIKV biology, propose  
529 conclusions for research decisions, predict drug efficacy, as exemplified in the  
530 results section, as well as propose hypotheses on specific host factors and signalling  
531 pathways affected by ZIKV. The map can help to distinguish between multiple  
532 potential targets of a ZIKV effective drug. The integration of information about  
533 effectiveness of other drugs as well as their target genes and the information about  
534 genes whose expression is affected during ZIKV infection indicated that Sorafenib  
535 likely acts via its target genes, *FLT3* and/or *BRAF*, but not via its alternative target  
536 genes *VEGFR* or *PDGFR*. In addition, the number of drugs to be screened was  
537 reduced from 774 to 64 by filtering potential drug candidates based on their network  
538 distance to ZIKV infection associated genes and additional phenotype relevant  
539 additional knowledge, such as contained in the “FDA pregnancy” label.

540

541 The conclusions that can be drawn are limited by the initially low number of available  
542 publications and limited experimental data, a situation which is inherent to most  
543 emerging epidemics. Nevertheless, the work presented shows that the use of a  
544 knowledge integrating system can provide guidance for clinical and research  
545 responses, such as follow-up studies regarding the association between ZIKV,

546 microcephaly and epilepsy, the validation of candidate drugs for ZIKV treatment, and  
547 the validation of candidate genes in specific functional assays to better understand  
548 molecular ZIKV infection mechanisms. or to complement existing functional genomic  
549 approaches with proteomics studies, such as the integrated proteomics approach  
550 identifying cellular targets of ZIKV proteins (38,39). These studies allow additional  
551 comparative analyses between ZIKV and other flavivirus family members in terms of  
552 virulence and pathogenic traits.

553 Another limitation of the system is the restricted types of information which can be  
554 retrieved by text mining. While qualitative associations between genes/proteins,  
555 drugs, diseases and organisms are readily amendable to automatic approaches, it is  
556 currently almost impossible to extract, for example, clinical study designs, detailed  
557 quantitative information or complex treatment plans.

558 Finally, the ZIKA KB in its current stage enables exploration of the integrated  
559 information, as well as generation and curation of text-mining analysis but is not a  
560 public tool for molecular interaction and disease map generation. The functions  
561 required for these tasks will need further refinement before they can be made  
562 available in a general way.

563

564 In summary, this approach in our opinion, provides a feasible way to collect and  
565 integrate existing knowledge to better understand the molecular mechanisms of an  
566 emerging pathogen. In addition our approach helps to identify gaps in knowledge  
567 and, together with the other features, guides rapid and effective responses to future  
568 epidemics. We have made the specific outcome of our approach, the Zika  
569 KnowledgeBase, publicly available as a hopefully valuable resource to the ZIKV  
570 research community.

571 In the light of the current COVID-19 pandemic we now apply the described workflow  
572 to SARS-CoV-2 and other coronaviruses and will make the developed resource  
573 available as described.

574

575

## 576 **Acknowledgements**

577 The authors wish to thank their colleagues for discussion and feedback, and  
578 Sheridon Sauer and Shannon Frances for critical review of the article.

579

## 580 **References**

581

- 582 1. Fujita KA, Ostaszewski M, Matsuoka Y, Ghosh S, Glaab E, Trefois C, et al.  
583 Integrating pathways of Parkinson's disease in a molecular interaction map. *Mol*  
584 *Neurobiol.* 2014 Feb;49(1):88–102.
- 585 2. Nim HT, Furtado MB, Costa MW, Kitano H, Rosenthal NA, Boyd SE.  
586 CARFMAP: A Curated Pathway Map of Cardiac Fibroblasts. *PLoS One.*  
587 2015;10(12):e0143274.
- 588 3. Guo X, Xu Y, Bian G, Pike AD, Xie Y, Xi Z. Response of the mosquito protein  
589 interaction network to dengue infection. *BMC Genomics.* 2010 Jun 16;11:380.
- 590 4. Le Breton M, Meyniel-Schicklin L, Deloire A, Coutard B, Canard B, de  
591 Lamballerie X, et al. Flavivirus NS3 and NS5 proteins interaction network: a  
592 high-throughput yeast two-hybrid screen. *BMC Microbiol.* 2011 Oct 20;11:234.

- 593 5. Matsuoka Y, Matsumae H, Katoh M, Einfeld AJ, Neumann G, Hase T, et al. A  
594 comprehensive map of the influenza A virus replication cycle. *BMC Syst Biol*.  
595 2013 Oct 2;7:97.
- 596 6. Anderson KB, Thomas SJ, Endy TP. The Emergence of Zika Virus: A Narrative  
597 Review. *Ann Intern Med*. 2016 Aug 2;165(3):175–83.
- 598 7. Pierson TC, Diamond MS. The emergence of Zika virus and its new clinical  
599 syndromes. *Nature*. 2018;560(7720):573–81.
- 600 8. Pardy RD, Richer MJ. Zika Virus Pathogenesis: From Early Case Reports to  
601 Epidemics. *Viruses*. 2019 Sep 21;11(10).
- 602 9. Sharma V, Sharma M, Dhull D, Sharma Y, Kaushik S, Kaushik S. Zika virus: an  
603 emerging challenge to public health worldwide. *Can J Microbiol*. 2019 Nov 4;1–  
604 12.
- 605 10. Murray JS. Understanding Zika virus. *J Spec Pediatr Nurs JSPN*. 2017;22(1).
- 606 11. Carod-Artal FJ. Epidemiology and neurological complications of infection by the  
607 Zika virus: a new emerging neurotropic virus. *Rev Neurol*. 2016 Apr  
608 1;62(7):317–28.
- 609 12. Liberati A, Altman DG, Tetzlaff J, Mulrow C, Gøtzsche PC, Ioannidis JPA, et al.  
610 The PRISMA Statement for Reporting Systematic Reviews and Meta-Analyses  
611 of Studies That Evaluate Health Care Interventions: Explanation and  
612 Elaboration. *PLoS Med* [Internet]. 2009 Jul 21 [cited 2011 Feb  
613 16];6(7):e1000100. Available from:  
614 <http://dx.doi.org/10.1371/journal.pmed.1000100>

- 615 13. Dalkey N, Helmer O. An Experimental Application of the Delphi Method to the  
616 use of experts. *Manag Sci.* 1963;9(3):458–67.
- 617 14. Suh KS, Park SW, Castro A, Patel H, Blake P, Liang M, et al. Ovarian cancer  
618 biomarkers for molecular biosensors and translational medicine. *Expert Rev Mol*  
619 *Diagn* [Internet]. 2010 Nov [cited 2010 Dec 21];10(8):1069–83. Available from:  
620 <http://www.ncbi.nlm.nih.gov/pubmed/21080822>
- 621 15. Losko S, Heumann K. Semantic data integration and knowledge management  
622 to represent biological network associations. *Methods Mol Biol Clifton NJ*  
623 [Internet]. 2009 [cited 2009 Jul 15];563:241–58. Available from:  
624 <http://www.ncbi.nlm.nih.gov/pubmed/19597789>
- 625 16. Maier D, Kalus W, Wolff M, Kalko SG, Roca J, Marin de Mas I, et al. Knowledge  
626 management for systems biology a general and visually driven framework  
627 applied to translational medicine. *BMC Syst Biol* [Internet]. 2011 [cited 2011 Apr  
628 27];5:38. Available from: <http://www.ncbi.nlm.nih.gov/pubmed/21375767>
- 629 17. Cano I, Tényi Á, Schueller C, Wolff M, Migueláñez MMH, Gomez-Cabrero D, et  
630 al. The COPD Knowledge Base: enabling data analysis and computational  
631 simulation in translational COPD research. *J Transl Med* [Internet]. 2014 Nov 28  
632 [cited 2014 Nov 27];12(Suppl 2):S6. Available from: [http://www.translational-](http://www.translational-medicine.com/content/12/S2/S6/abstract)  
633 [medicine.com/content/12/S2/S6/abstract](http://www.translational-medicine.com/content/12/S2/S6/abstract)
- 634 18. Degtyarenko K, de Matos P, Ennis M, Hastings J, Zbinden M, McNaught A, et  
635 al. ChEBI: a database and ontology for chemical entities of biological interest.  
636 *Nucleic Acids Res* [Internet]. 2008 Jan [cited 2011 Jul 28];36(Database

637 issue):D344-350. Available from:

638 <http://www.ncbi.nlm.nih.gov/pubmed/17932057>

639 19. The international conference for the tenth revision of the International  
640 Classification of Diseases. Strengthening of Epidemiological and Statistical  
641 Services Unit. World Health Organization, Geneva. World Health Stat Q Rapp  
642 Trimest Stat Sanit Mond. 1990;43(4):204–45.

643 20. Losko S, Wenger K, Kalus W, Ramge A, Wiehler J, Heumann K. Knowledge  
644 Networks of Biological and Medical Data: An Exhaustive and Flexible Solution  
645 to Model Life Science Domains. In: Data Integration in the Life Sciences.  
646 Springer Berlin / Heidelberg; 2006. p. 232–9. (Lecture Notes in Computer  
647 Science; vol. Volume 4075/2006).

648 21. Schriml LM, Arze C, Nadendla S, Chang Y-WW, Mazaitis M, Felix V, et al.  
649 Disease Ontology: a backbone for disease semantic integration. Nucleic Acids  
650 Res [Internet]. 2012 Jan [cited 2012 Jan 24];40(Database issue):D940-946.  
651 Available from: <http://www.ncbi.nlm.nih.gov/pubmed/22080554>

652 22. de Coronado S, Haber MW, Sioutos N, Tuttle MS, Wright LW. NCI Thesaurus:  
653 using science-based terminology to integrate cancer research results. Stud  
654 Health Technol Inform [Internet]. 2004 [cited 2010 Nov 27];107(Pt 1):33–7.  
655 Available from: <http://www.ncbi.nlm.nih.gov/pubmed/15360769>

656 23. Wheeler DL, Chappey C, Lash AE, Leipe DD, Madden TL, Schuler GD, et al.  
657 Database resources of the National Center for Biotechnology Information.  
658 Nucleic Acids Res. 2000 Jan 1;28(1):10–4.

- 659 24. Goto S, Nishioka T, Kanehisa M. LIGAND: chemical database for enzyme  
660 reactions. *Bioinforma Oxf Engl* [Internet]. 1998 [cited 2011 Jul 28];14(7):591–9.  
661 Available from: <http://www.ncbi.nlm.nih.gov/pubmed/9730924>
- 662 25. Maier D, Kalus W, Wolff M, Kalko SG, Roca J, Marin de Mas I, et al. Knowledge  
663 management for systems biology a general and visually driven framework  
664 applied to translational medicine. *BMC Syst Biol*. 2011 Mar 5;5:38.
- 665 26. Kumari B, Jain P, Das S, Ghosal S, Hazra B, Trivedi AC, et al. Dynamic  
666 changes in global microRNAome and transcriptome reveal complex miRNA-  
667 mRNA regulated host response to Japanese Encephalitis Virus in microglial  
668 cells. *Sci Rep*. 2016 Feb 3;6:20263.
- 669 27. Nowakowski TJ, Pollen AA, Di Lullo E, Sandoval-Espinosa C, Bershteyn M,  
670 Kriegstein AR. Expression Analysis Highlights AXL as a Candidate Zika Virus  
671 Entry Receptor in Neural Stem Cells. *Cell Stem Cell*. 2016 May 5;18(5):591–6.
- 672 28. Tang H, Hammack C, Ogden SC, Wen Z, Qian X, Li Y, et al. Zika Virus Infects  
673 Human Cortical Neural Progenitors and Attenuates Their Growth. *Cell Stem*  
674 *Cell*. 2016 May 5;18(5):587–90.
- 675 29. Zhang R, Miner JJ, Gorman MJ, Rausch K, Ramage H, White JP, et al. A  
676 CRISPR screen defines a signal peptide processing pathway required by  
677 flaviviruses. *Nature*. 2016 07;535(7610):164–8.
- 678 30. Moore EF. The shortest path through a maze. In: *Proceedings of the*  
679 *International Symposium on the Theory of Switching*. Harvard University Press;  
680 1959. p. 285–292.

- 681 31. Barrows NJ, Campos RK, Powell ST, Prasanth KR, Schott-Lerner G, Soto-  
682 Acosta R, et al. A Screen of FDA-Approved Drugs for Inhibitors of Zika Virus  
683 Infection. *Cell Host Microbe*. 2016 Aug 10;20(2):259–70.
- 684 32. Choy MM, Zhang SL, Costa VV, Tan HC, Horrevorts S, Ooi EE. Proteasome  
685 Inhibition Suppresses Dengue Virus Egress in Antibody Dependent Infection.  
686 *PLoS Negl Trop Dis*. 2015 Nov;9(11):e0004058.
- 687 33. Bublil EM, Yarden Y. The EGF receptor family: spearheading a merger of  
688 signaling and therapeutics. *Curr Opin Cell Biol*. 2007 Apr;19(2):124–34.
- 689 34. Grant A, Ponia SS, Tripathi S, Balasubramaniam V, Miorin L, Sourisseau M, et  
690 al. Zika Virus Targets Human STAT2 to Inhibit Type I Interferon Signaling. *Cell*  
691 *Host Microbe*. 2016 Jun 8;19(6):882–90.
- 692 35. Higgins J (editor), Green S (editor). *Cochrane Handbook for Systematic*  
693 *Reviews of Interventions* [Internet]. 5.1.0. 2011. (The Cochrane Collaboration).  
694 Available from: <http://handbook.cochrane.org>
- 695 36. Turner T, Misso M, Harris C, Green S. Development of evidence-based clinical  
696 practice guidelines (CPGs): comparing approaches. *Implement Sci* [Internet].  
697 2008 [cited 2016 Dec 15];3:45. Available from: [http://dx.doi.org/10.1186/1748-](http://dx.doi.org/10.1186/1748-5908-3-45)  
698 [5908-3-45](http://dx.doi.org/10.1186/1748-5908-3-45)
- 699 37. Tényi Á, de Atauri P, Gomez-Cabrero D, Cano I, Clarke K, Falciani F, et al.  
700 ChainRank, a chain prioritisation method for contextualisation of biological  
701 networks. *BMC Bioinformatics*. 2016;17(1):17.



702 38. Scaturro P, Stukalov A, Haas DA, Cortese M, Draganova K, Płaszczycya A, et al.  
703 An orthogonal proteomic survey uncovers novel Zika virus host factors. *Nature*.  
704 2018;561(7722):253–7.

705 39. Scaturro P, Kastner AL, Pichlmair A. Chasing Intracellular Zika Virus Using  
706 Proteomics. *Viruses*. 2019 Sep 19;11(9).

707

708

709

## 710 **Supporting Information**

711

### 712 **S1 Fig. Molecular interaction and disease map generation protocol**

713

### 714 **S2 Fig. ZIKV KnowledgeBase Data Model**

715

716 Based on input from clinical and virology experts the concepts required to represent  
717 existing pathophysiological knowledge of infectious diseases were modelled using  
718 the BioXM Knowledge management environment. To this end objects (as nodes)  
719 and relations (as edges) are defined on an abstract level such as “gene”, “disease”  
720 or “interacts with”. For the ZIKV KB we focused on concepts required to represent  
721 text mining results and information from structured databases of protein-protein and  
722 drug – protein interaction, namely genes, diseases, pathogens and drugs.

723 Pathogens are displayed as yellow nodes and were uniquely identified by using the

724 NCBI Taxonomy ontology. Compounds (white nodes) were referenced to entries of  
725 the ChEBI ontology. Diseases (violet nodes) and genes (orange nodes) can  
726 reference one or multiple sources such as ICD10, Entrez or Ensembl. Relationships  
727 between pathogens, genes, drugs and compounds were defined by three types of  
728 text mining relations, upregulation (green edges), downregulation (red edges) and  
729 regulation (black edges). Associated information, not represented as object or  
730 relation, is being stored as so called “annotation” basically a note that can be  
731 assigned to any semantic concept. The annotation form “Textmining information  
732 evidence”, for example, stores information, such as the sentence containing the  
733 extracted statement (field “Reference”) or the predicate (field “Interaction type”) and  
734 links directly to the PubMed entry (represented as BioRS entry: MEDLINE). To  
735 enable experts to support or contradict extracted text mining relationships the  
736 annotation form “Textmining Validation” was introduced to generate a configurable  
737 curation workflow. Molecular interaction and disease maps are modelled using the  
738 “context” object type to group specific sub-networks (interactions between genes,  
739 diseases, pathogens and drugs) within the global semantic network. PPI and drug-  
740 protein interactions are represented by the “Interaction” relation (orange edges) with  
741 supportive evidence stored in two annotation forms (“BioGRID Interaction Evidence”  
742 and “Interaction Information” storing information from the VirHostNet database), and  
743 can be added as additional sub-networks to a disease map.

744 Based on the data model dynamic visualisation can be generated, for example drug  
745 targets or differentially expressed genes based on configurable queries and views.  
746 The data model is automatically transformed into a natural language like query and  
747 reporting language. This language can be used to e.g. define a query retrieving the  
748 number of drugs that interact with a protein of interest, and generating a view which

749 applies a colour code to a gene according to the number of interacting drugs.

750

751 **S3 Fig. Molecular interaction and disease map wizard.** (i) A text mining analysis  
752 result (or multiple ones) can be chosen from to start populating the map. (ii) Based  
753 on the genes extracted from text mining relationships (highlighted in orange, top left)  
754 a network search algorithm is applied to extend the map with PPI & protein-drug  
755 interactions. (iii) Upon selection of wanted interaction data the final map is  
756 automatically rendered in different perspectives, displaying literature evidence,  
757 experimental data or drug targets (shown from left to right, bottom).

758

759 **S4 Step-by-step guide to reproduce the results in the web interface**

760

761 **S5 Manual for web interface**

762

# Elucidation of ZIKV pathogenesis/ biology

## Identification of candidate drugs for repositioning

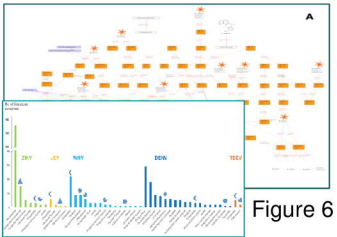

Figure 6

Figure 5

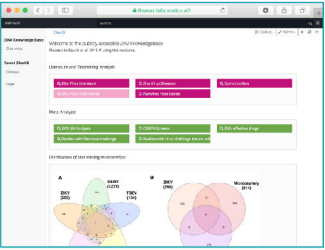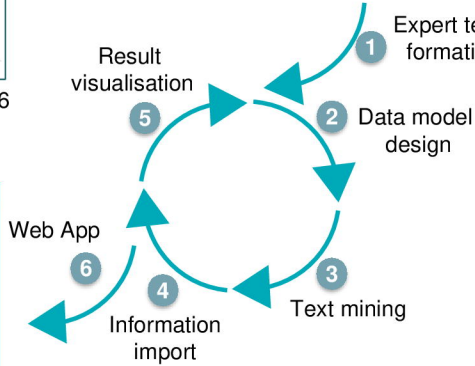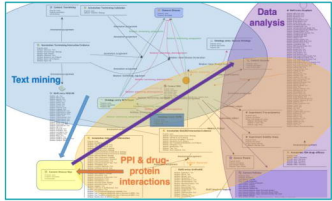

**Data types:**  
Transcriptomics, Interactomics

→ Molecular mechanisms between ZIKV and neurological disease  
→ Novel research hypotheses

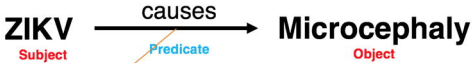

- Medline
- Databases
- Newsfeeds
- In-house documents

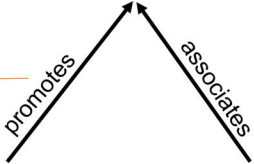

**CEP62**

**CENPJ**

**A**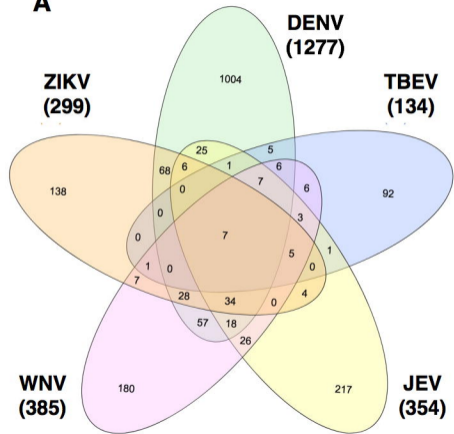**B**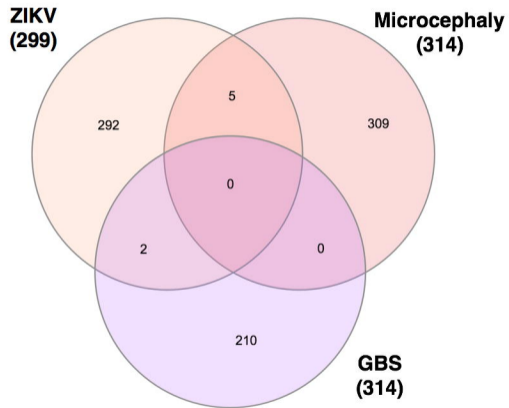

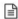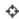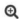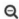

Literature evidence

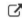

A

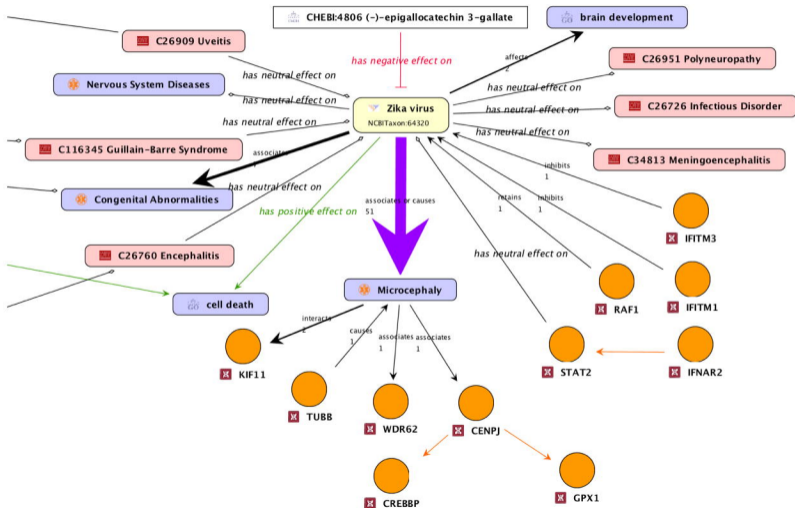

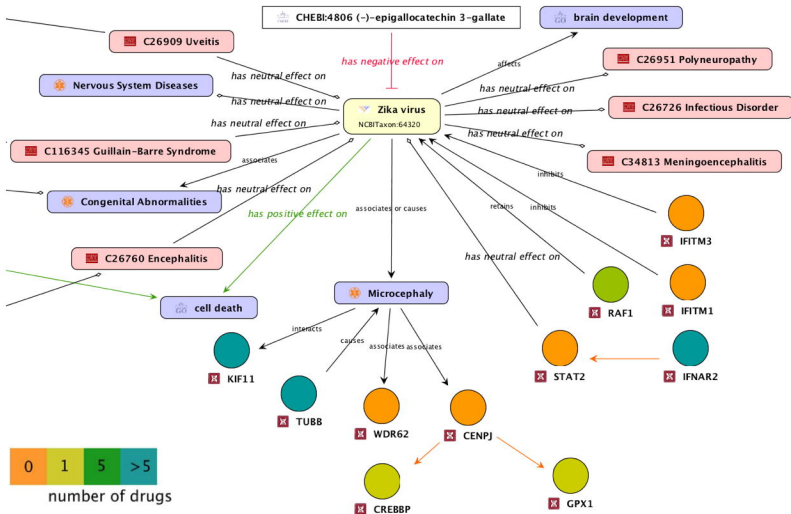



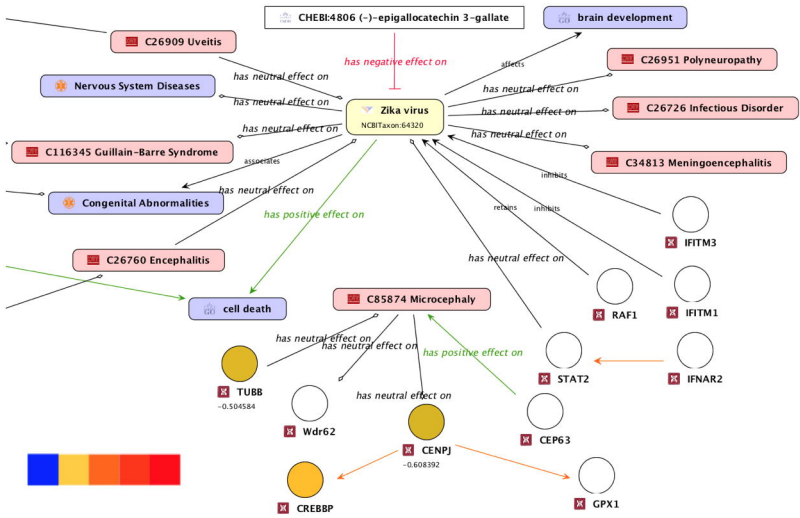

# No of literature evidence

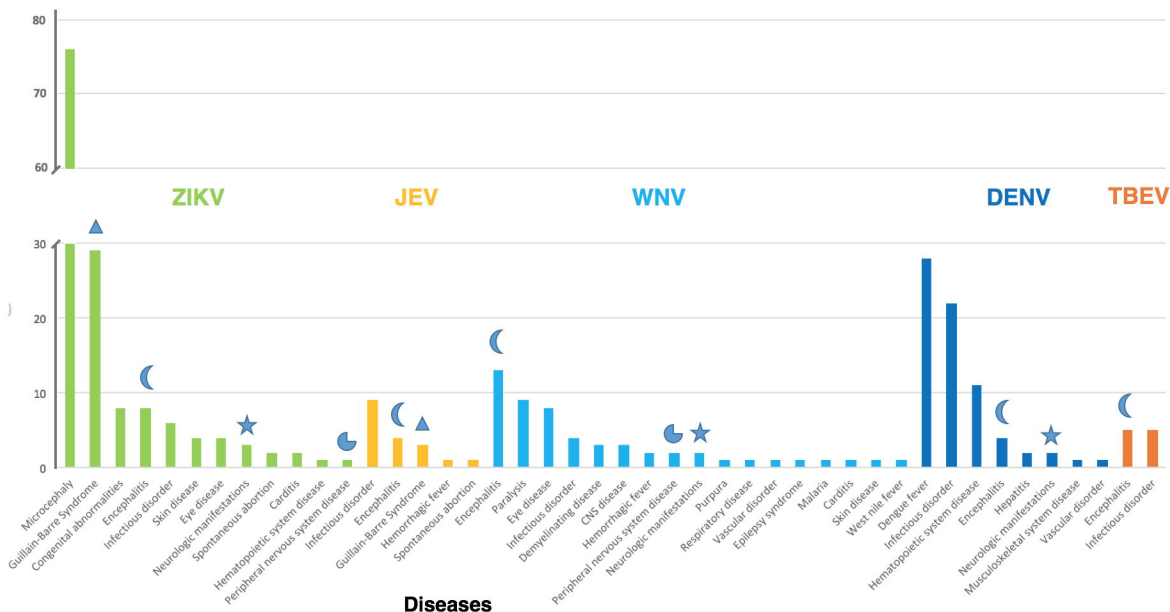

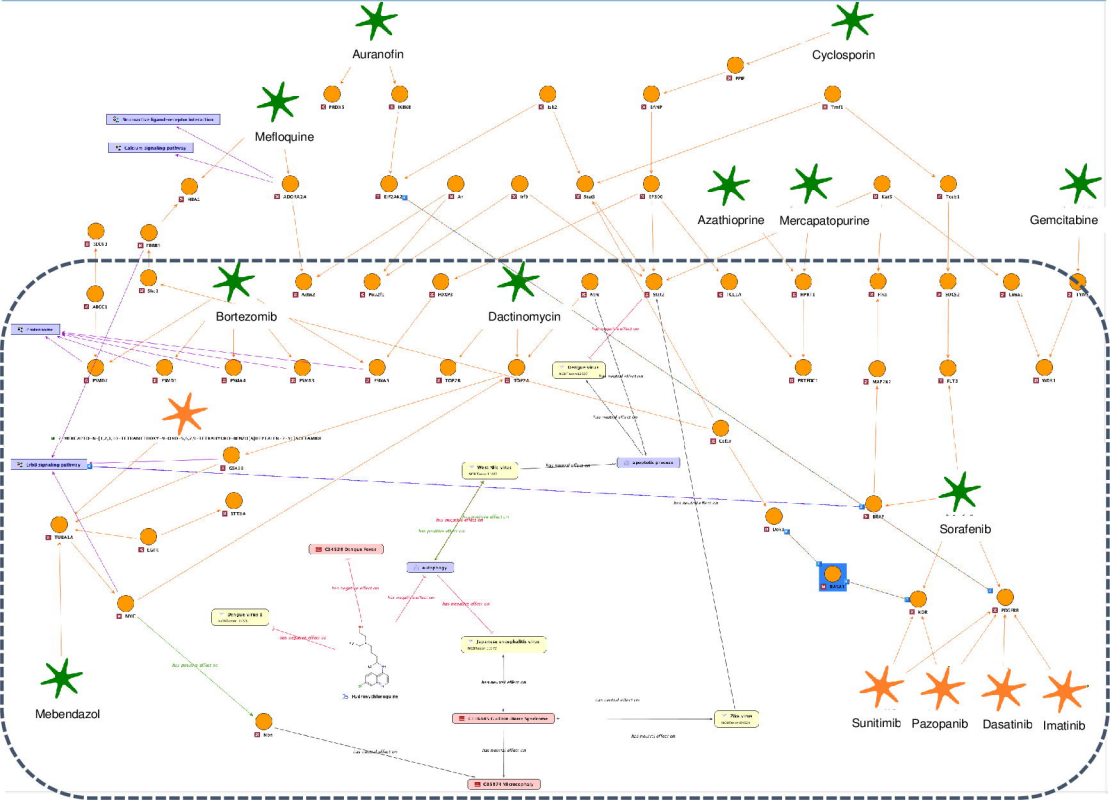

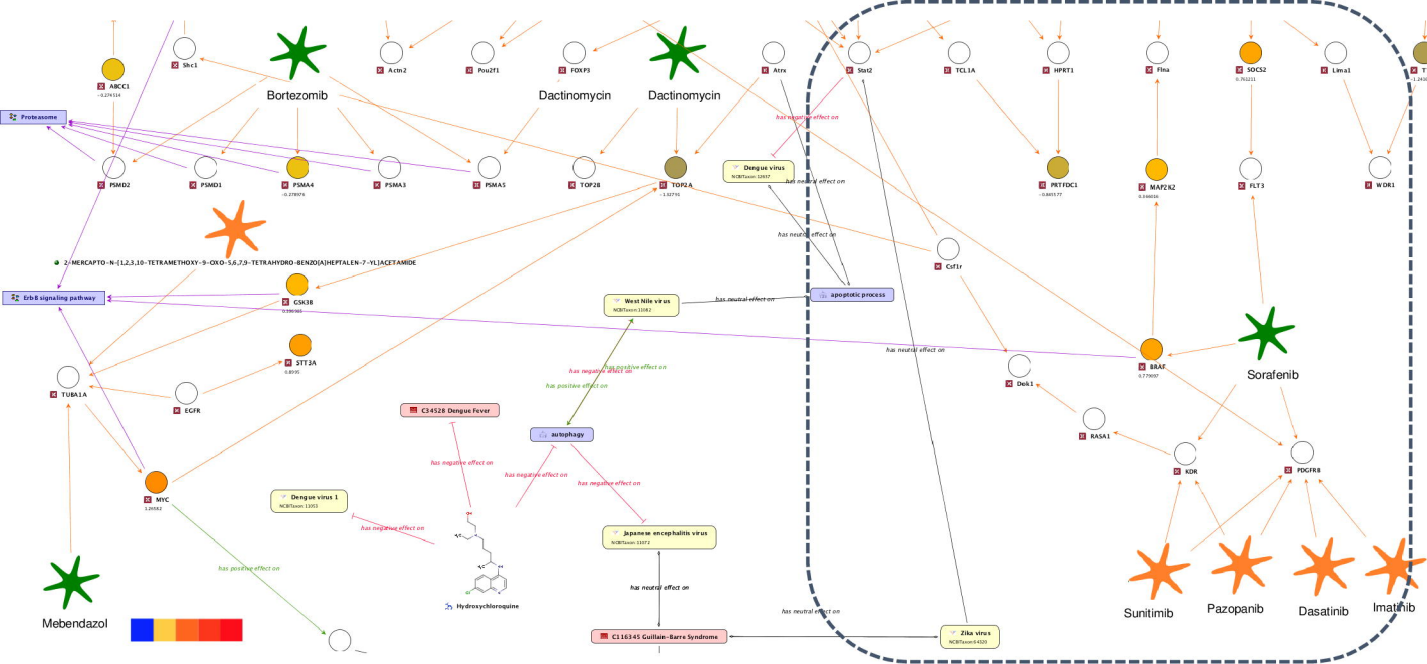

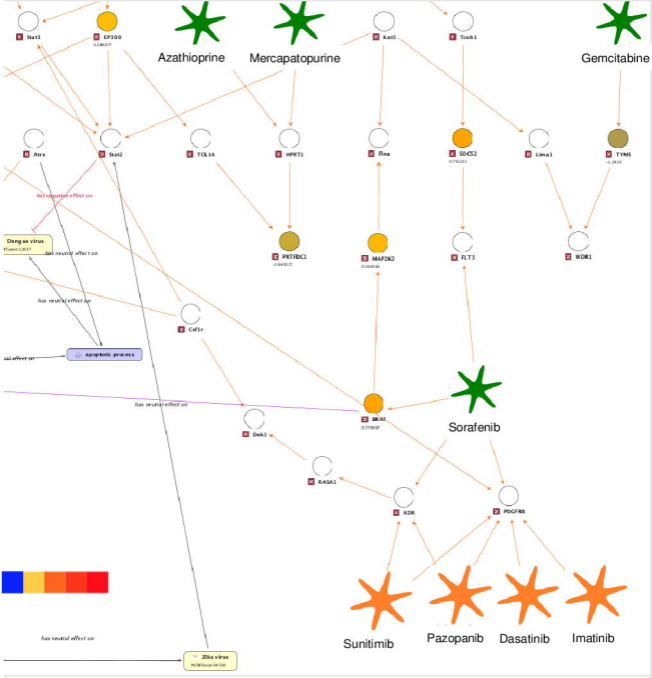

Source: https://www.biorxiv.org/content/10.1101/2020.04.17.044743v1.full.pdf
